# Supplementary material for: Evolutionary Implications of the microRNA- and piRNA Complement of Lepidodermella squamata (Gastrotricha)
Source: MDPI journal article supplement (doi:10.3390/ncrna5010019), 2019-02-22
Supplement: s1 [file s1]

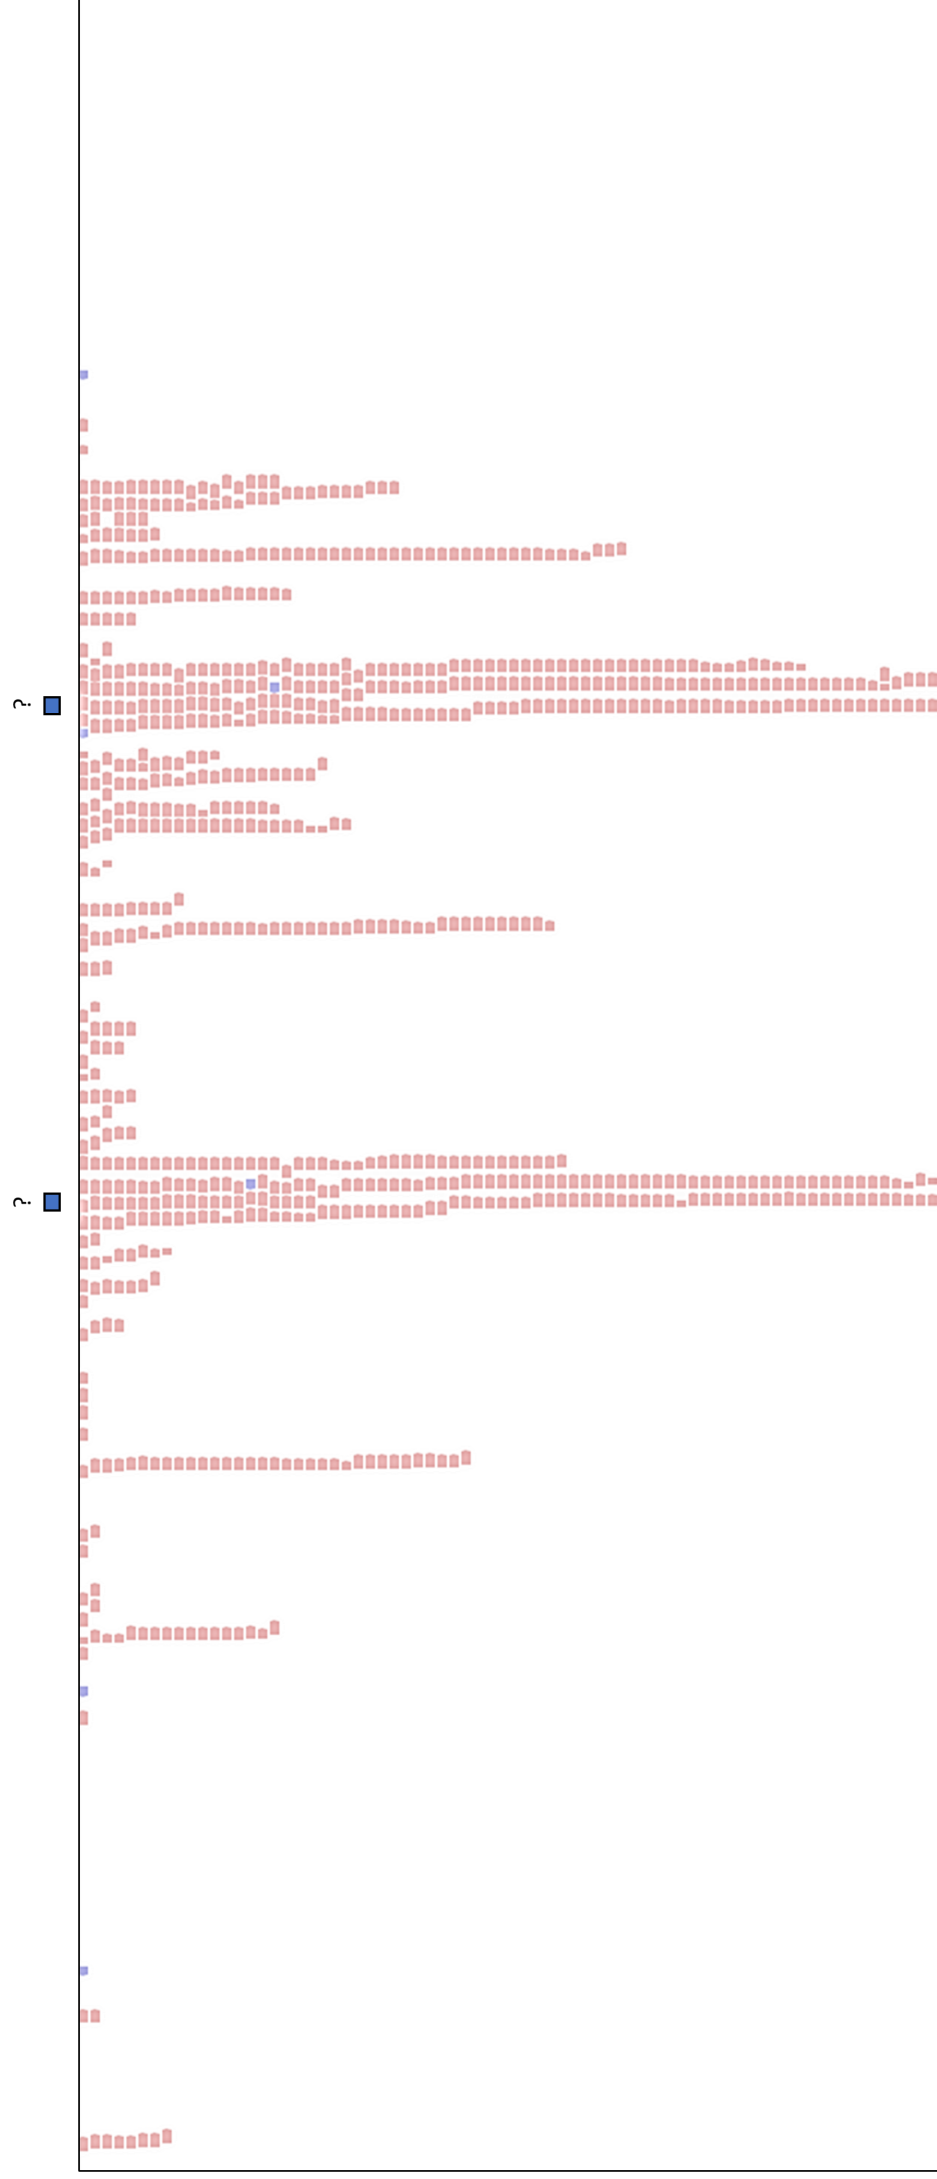

piRNA cluster #3: scaffold367\_size99769: 90,134-93,976
