# Supplementary material for: Evolutionary Implications of the microRNA- and piRNA Complement of Lepidodermella squamata (Gastrotricha)
Source: MDPI journal article supplement (doi:10.3390/ncrna5010019), 2019-02-22
Supplement: s1 [file s1]

poly(A)  
LTR/Gypsy-C1gr

?

LTR/Copia  
LINE/RTE-BovB

LTR/Copia  
LTR/Copia  
LTR/Gypsy

LTR/Gypsy

?

piRNA cluster #2: scaffold171\_size172051:144,160-158,000
