# Supplementary material for: Evolutionary Implications of the microRNA- and piRNA Complement of Lepidodermella squamata (Gastrotricha)
Source: MDPI journal article supplement (doi:10.3390/ncrna5010019), 2019-02-22
Supplement: s1 [file s1]

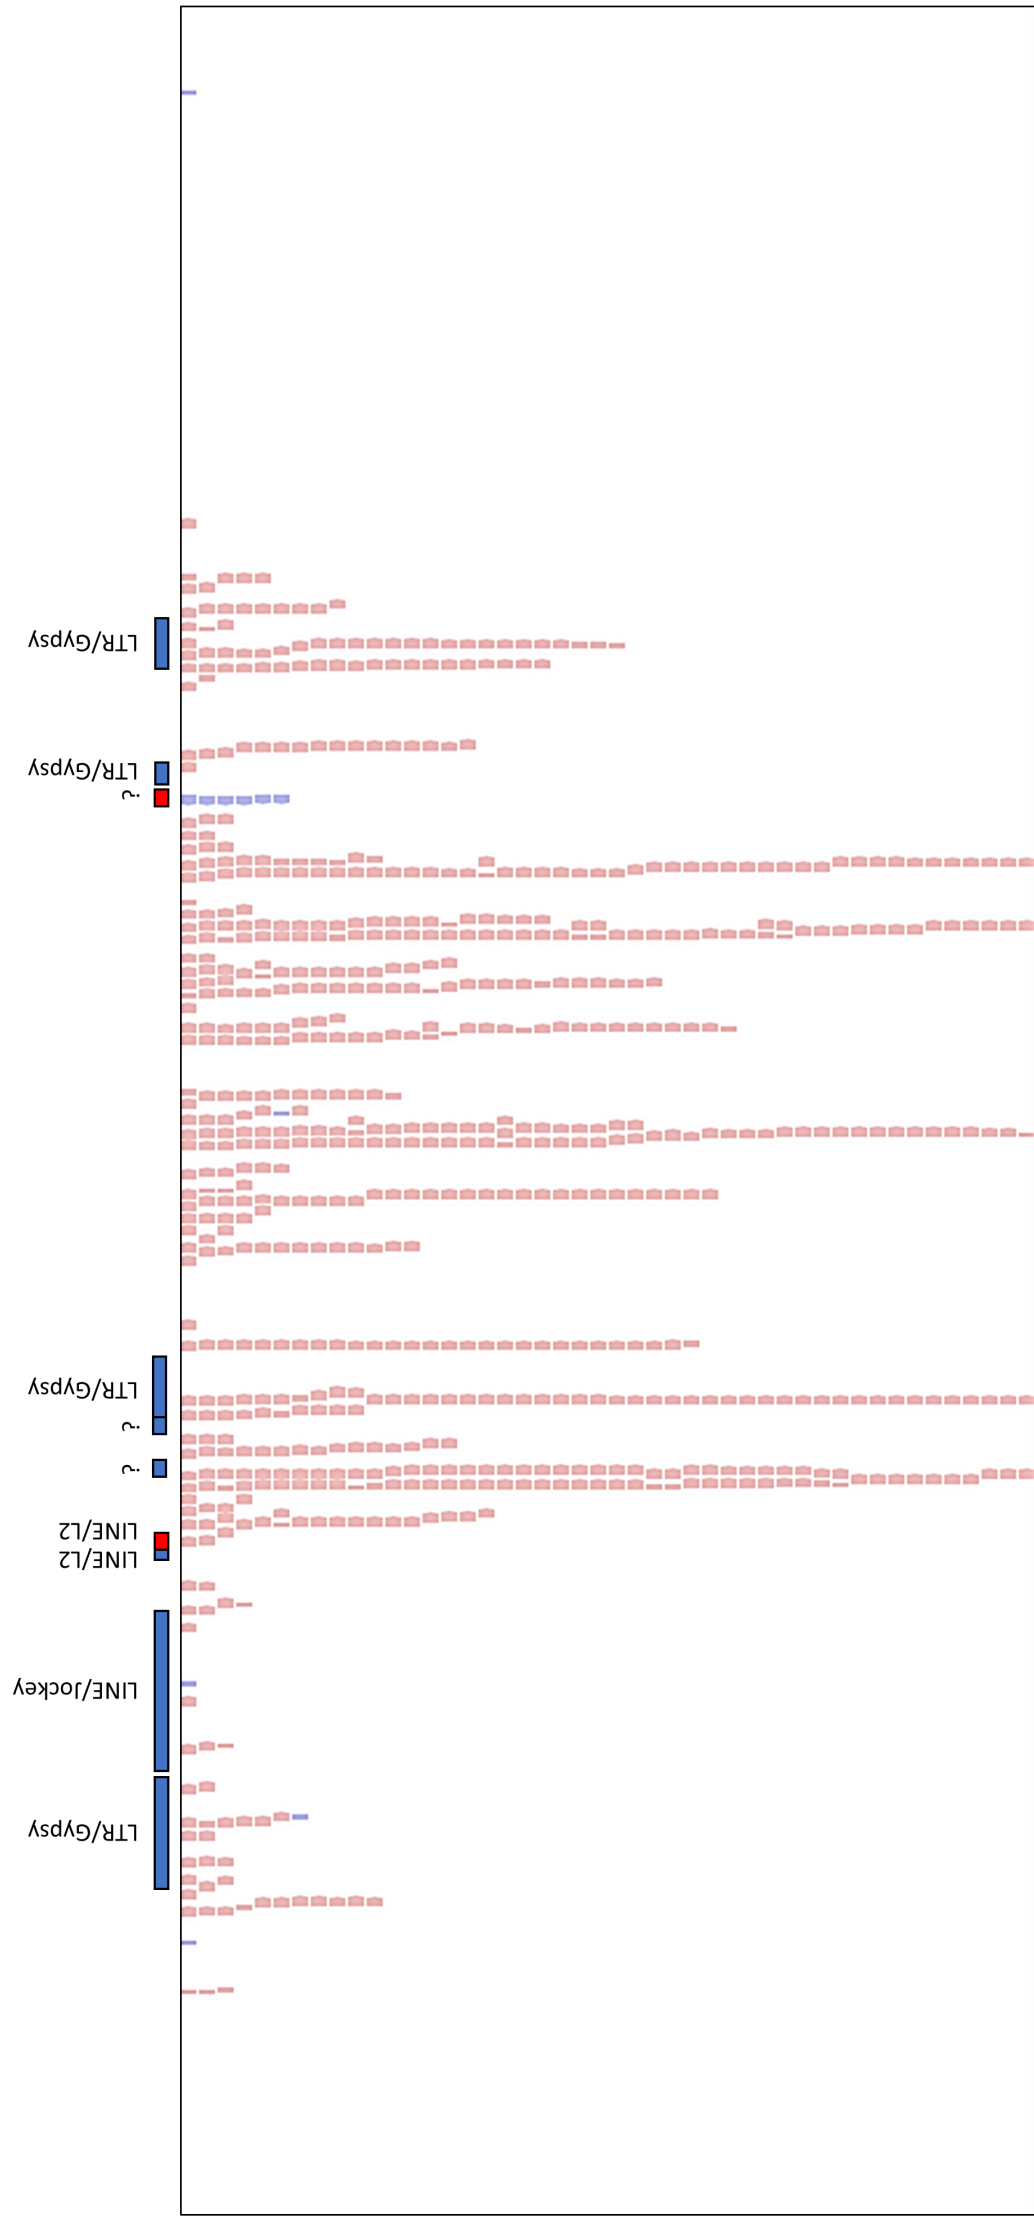

piRNA cluster #1: scaffold95\_size236010:16,013-20,557
