# Supplementary material for: Evolutionary Implications of the microRNA- and piRNA Complement of Lepidodermella squamata (Gastrotricha)
Source: MDPI journal article supplement (doi:10.3390/ncrna5010019), 2019-02-22
Supplement: s1 [file s1]

LINE/RTE-X  
LINE  
LTR/Copia

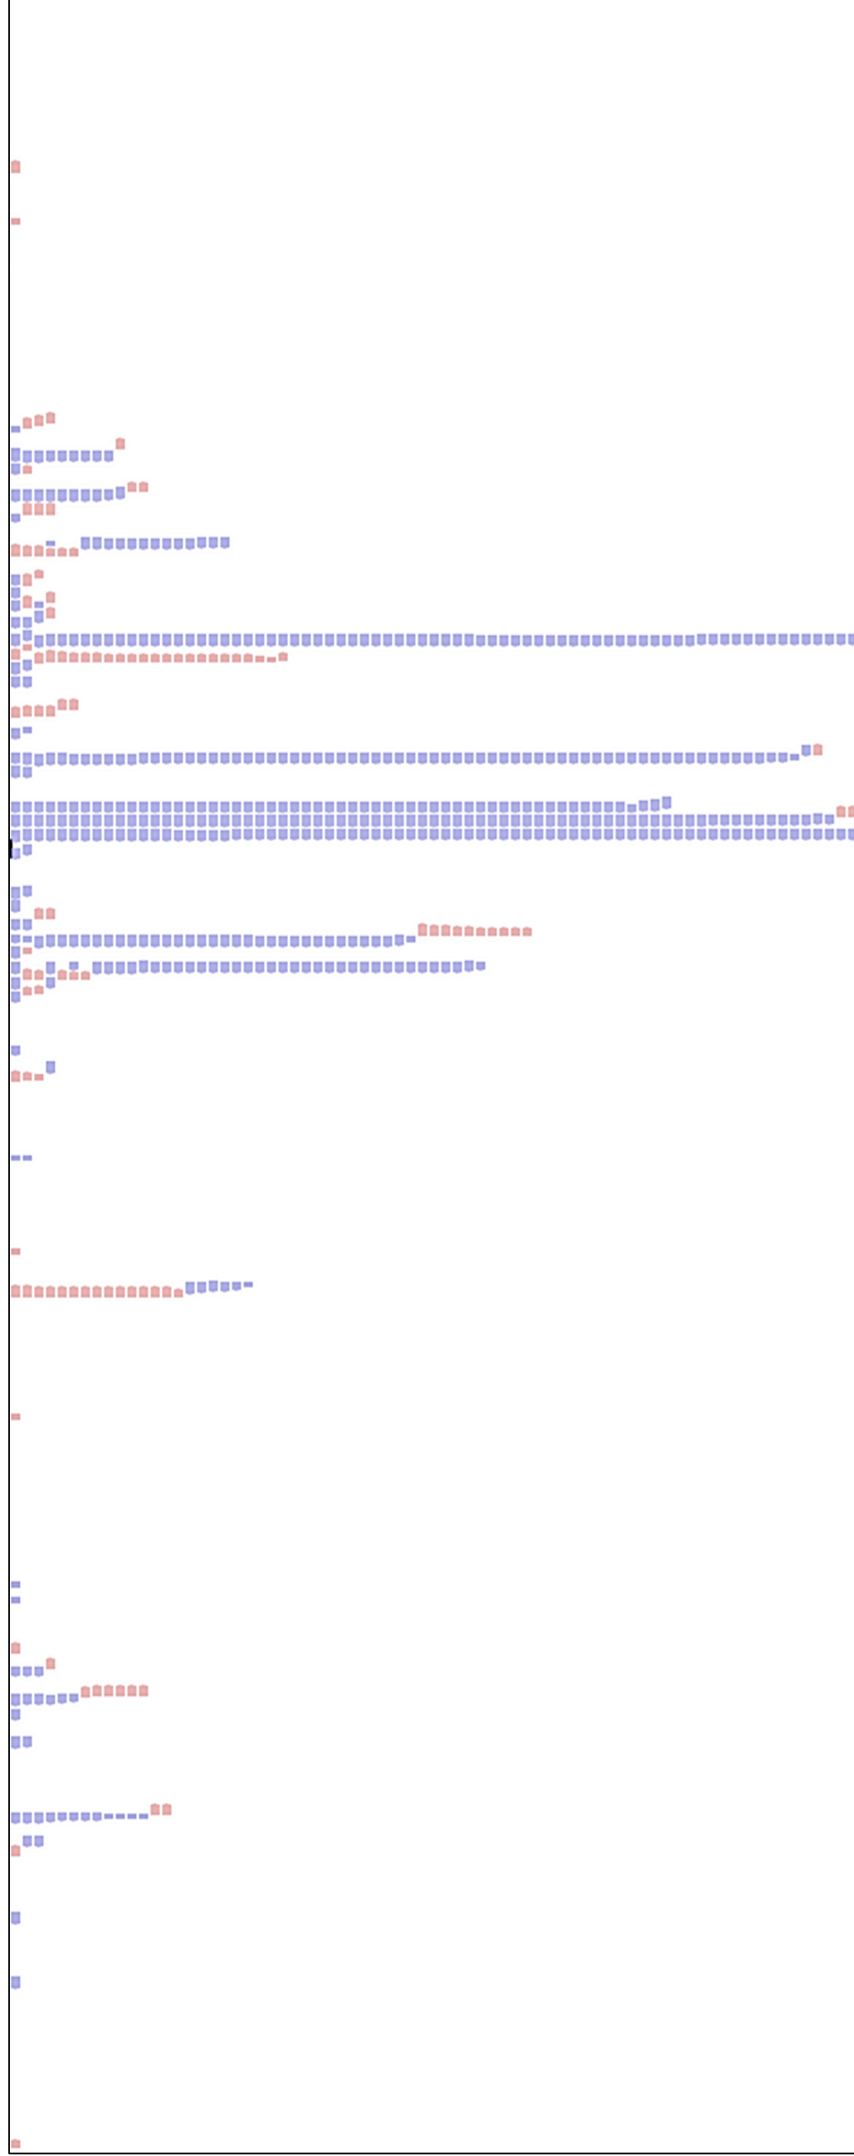

piRNA cluster #4: scaffold386\_size93225:37,926-42,144
