# Supplementary material for: Evolutionary Implications of the microRNA- and piRNA Complement of Lepidodermella squamata (Gastrotricha)
Source: MDPI journal article supplement (doi:10.3390/ncrna5010019), 2019-02-22
Supplement: s1 [file s1]

a

# PAZ domain

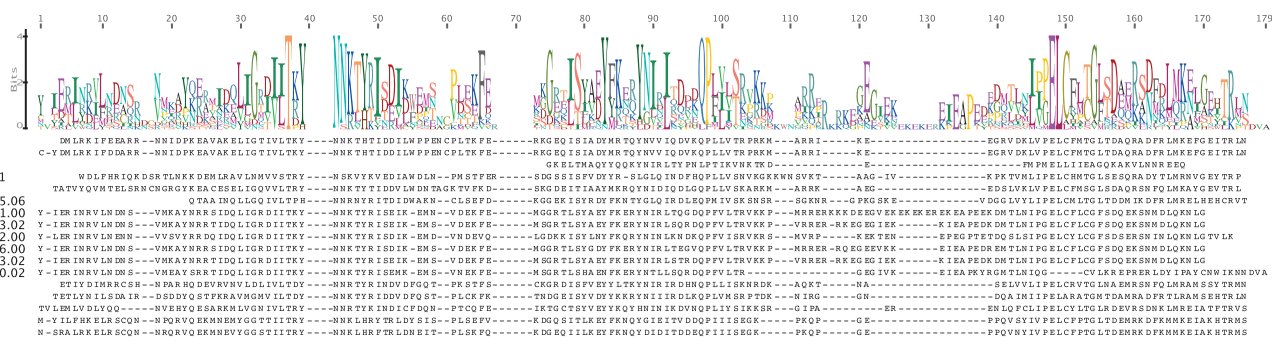

L. squamata  
Platyhelminths  
Ecdysozoans

b

# Piwi domain

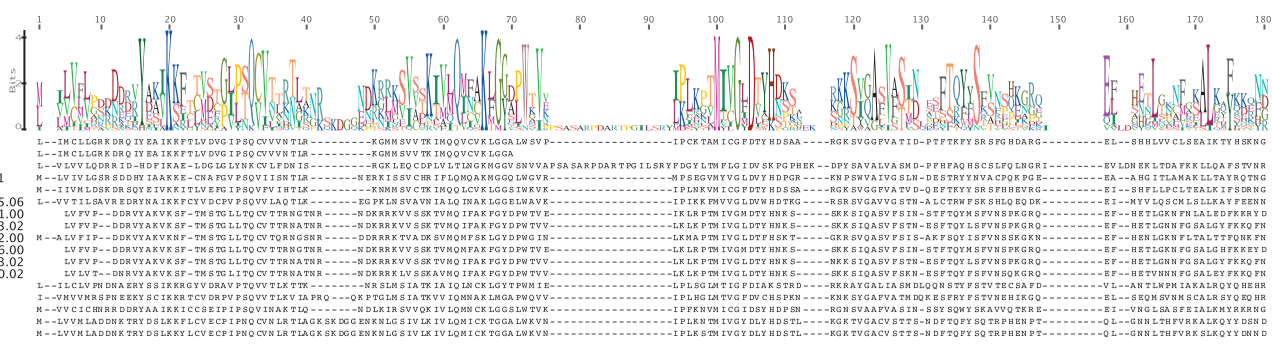

L. squamata  
Platyhelminths  
Ecdysozoans

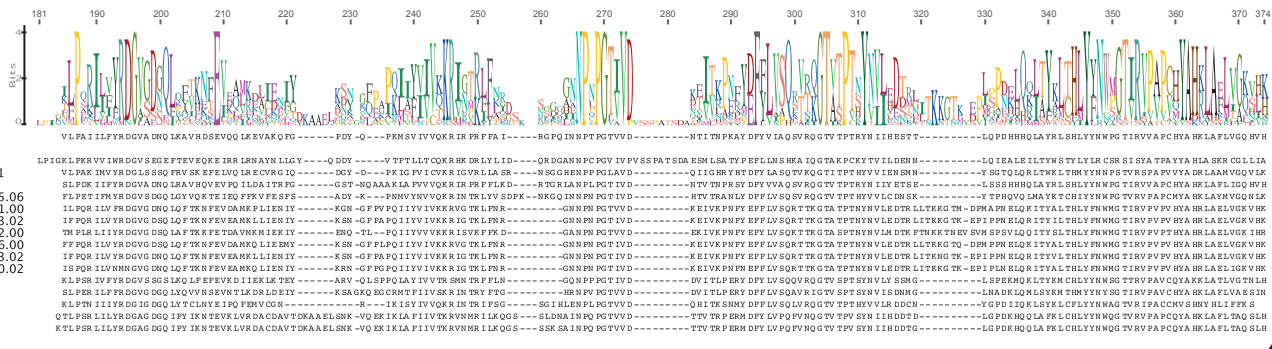

L. squamata  
Platyhelminths  
Ecdysozoans
